# Supplementary material
Source: publisher figshare collection journal article supplement (https://acs.figshare.com/ndownloader/files/3748573)
Supplement: Supplementary file 1 [file 3748573]

**Available Data from Wells Report**

1. **Environmental data** that Exponent (the scientific investigation team) collected and evaluated are listed below. All of these values were obtained via weather reports or direct measurements by the team.
2. The likely temperature of the room when the pressures of the footballs were measured prior to the game (67–71°F).
3. The likely temperatures on the field during the first half (48–50°F).
4. The likely temperature of the room when the pressures of the footballs were measured at halftime (71–74°F).
5. The time that elapsed from when the balls were brought into the Official’s locker room at half-time and all the measurements were made, 13.5 minutes.
6. Some balls were damp; others were dry.
7. Atmospheric pressure of the day was approximately 1 atm (estimated)
8. Volume of a football for the pressure range of 10.5 to 13.5 psig is constant at 4.24 L. (Tested by scientific team.)
9. **Additional Facts**
10. Initial pressure of Patriot’s balls was 12.5 psig.
11. Initial pressure of Colt’s balls was 13.0 psig
12. At half-time in the Official locker room, the Patriot’s balls were measured first and then Colt’s ball.
13. Two gauges were used to measure the balls’ pressures at half-time (Non-Logo and Logo brand)
14. It is unclear which gauge was used at pre-game check, but it was most likely the Non-Logo gauge (the gauge that reads lower). (Tested by scientific team.)
15. Pressures of Footballs Measurement in the Officials Locker Room

| *Patriots’ Ball* | *Blakeman (Ref #1)*  *(psig)** | *Prioleau (Ref #2)*  *(psig)* |
| --- | --- | --- |
| *1* | *11.50* | *11.80* |
| *2* | *10.85* | *11.20* |
| *3* | *11.15* | *11.50* |
| *4* | *10.70* | *11.00* |
| *5* | *11.10* | *11.45* |
| *6* | *11.60* | *11.95* |
| *7* | *11.85* | *12.30* |
| *8* | *11.10* | *11.55* |
| *9* | *10.95* | *11.35* |
| *10* | *10.50* | *10.90* |
| *11* | *10.90* | *11.35* |

| *Colts Balls* | *Blakeman (Ref #1)*  *(psig)* | *Prioleau (Ref #2)*  *(psig)* |
| --- | --- | --- |
| *1* | *12.70* | *12.35* |
| *2* | *12.75* | *12.30* |
| *3* | *12.50* | *12.95* |
| *4* | *12.55* | *12.15* |

*psig is pounds per square inch gauge pressure

1. **Background Knowledge Needed**
2. Gauge pressure is the pressure measured using a pressure gauge with units of pounds per square inch gauge (psig). It is the difference between atmospheric pressure and the pressure inside the object, the ball in this case. Absolute pressure is the “true” pressure in the object. It is calculated as the sum of the atmospheric pressure and the pressure of gas in the object. To use the ideal gas law (or any variation of it), you must use absolute pressure. To convert from psig to psi simply add 14.7 psi (atmospheric pressure in units of psi).
3. To use the ideal gas law (or any variation of it), you must use Kelvin. To convert from Fahrenheit temperature to Kelvin, use (°F-32)5/9 + 273.15 K.
4. 1 atm = 14.7 psi
